# Supplementary material for: Imaging Tumor-Infiltrating Lymphocytes in Brain Tumors with [64Cu]Cu-NOTA-anti-CD8 PET
Source: Oxford University Press journal article supplement (doi:10.1158/1078-0432.ccr-20-3243), 2021-01-25
Supplement: 10780432ccr203243-sup-249654_2_supp_6840505_qmtvcb.docx [file 10780432ccr203243-sup-249654_2_supp_6840505_qmtvcb.docx]

**SUPPLEMENT**

**Supplemental Figure 1. Purification and Stability of [64Cu]Cu-NOTA-anti-CD8.** (**a**) Purification of [64Cu]Cu-NOTA-anti-CD8 quantified by iTLC. (**b**) Stability of [64Cu]Cu-NOTA-anti-CD8 in human serum at 37 °C quantified by iTLC (*n* = 3/time point).

**Supplemental Figure 2. PET/CT of [64Cu]Cu-NOTA-anti-CD8 in Non-HIS and Non-Tumor-Bearing Controls in PDX 160721-1.** Representative co-registered PET/CT images of + Tumor – PBMC and – Tumor + PBMC NOG CIEA mouse brains 24 h following [64Cu]Cu-NOTA-anti-CD8 tracer injection (*n* = 3/condition).

**Supplemental Figure 3. Flow Cytometry Gating Strategy.** Splenocytes were gated for (**1**) cells (**2-3**) single cells (**4**) live cells (**5**) mouse CD45 - cells (**6**) human CD45 + cells (**7**) human CD3 + cells and (**8**) human CD8 + cells.

**Supplemental Figure 4. [64Cu]Cu-NOTA-anti-CD8 Uptake in PDX 160615-1.** Coregistered PET/CT images of + PBMCs GBM PDX 160615-1 at 24 hours following [64Cu]Cu-NOTA-anti-CD8 tracer injection (*n* = 5). IHC for human CD8,H&E and autoradiography (*n* = 3/condition) of PDX 160615-1.

**Supplemental Figure 5. Distribution of [64Cu]Cu-NOTA-anti-CD8 in the Brain.** H&E and autoradiography of striatal, hippocampal and cerebellar sections in the same respective brain. GBM tumor is PDX 160721-1 (*n* = 3).

| **PDX ID** | **PDX Mutation Features** | **PDX Deletion Features** | **PDX Amplification Features** |
| --- | --- | --- | --- |
| 160721-1 | APC, AR, ARID1B, BRCA2, EGFR, KIT, MAP3K1, MET, MLL2, MSH2/6, MYC, NOTCH1/2, PRDM1, PTEN, SOX9, SRSF2, TERT | B2M,  CDKN2B, FGFR2, GATA3, H3F3A, MAP2K1, PARP1, PTEN | EGFR, MDM4 |
| 160615-1 | AXIN1, BCOR, BRAF, BRCA2, FGFR2, MAP3K1, MSH6, NCOR1, NF1, NOTCH1, PTPRD, TERT, TET, TP53 | FGFR2, GATA3, PTEN, RET | EGFR |

**Supplemental Table 1. Mutation and Copy Number Alterations Maintained Across PDX Passages in Mice.** Genes mutated, deleted and amplified were identified by MSK IMPACT sequencing provided by the Brain Tumor Center.

| PDX# 160721-1 | A*01:01 | A*30:01 | B*08:01 | B*52:01 | C*07:01 | C*12:02 | DRB1*03:01 | DRB1*15:02 | DQB1*2:01 | DQB1*6:01 |
| --- | --- | --- | --- | --- | --- | --- | --- | --- | --- | --- |
| Donor 1 | A*01:01 | A*02:01 | B*08:01 | B*07:02 | C*07:01 | C*07:02 | DRB1*03:01 | DRB1*15:01 | DQB1*02:01 | DQB1*06:02 |
| Donor 2 | A*01:01 | A*29:02 | B*08:01 | B*44:03 | C*07:01 | C*16:01 | DRB1*03:01 | DRB1*07:01 | DQB1*02:01 | DQB1*03:03 |
| Donor 3 | A*01:01 | A*11:01 | B*08:01 | B*35:01 | C*07:01 | C*04:01 | DRB1*03:01 | DRB1*01:01 | DQB1*02:01 | DQB1*05:01 |
| Donor 4 | A*01:01 | A*02:01 | B*08:01 | B*44:02 | C*07:01 | C*07:04 | DRB1*03:01 | DRB1*07:01 | DQB1*02:01 | DQB1*02:01 |
| Donor 5 | A*01:01 | A*24:02 | B*08:01 | B*38:01 | C*07:01 | C*12:03 | DRB1*03:01 | DRB1*04:01 | DQB1*02:01 | DQB1*03:02 |
| Donor 6 | A*01:01 | A*26:01 | B*08:01 | B*38:01 | C*07:01 | C*12:03 | DRB1*03:01 | DRB1*04:02 | DQB1*02:01 | DQB1*03:02 |
| Donor 7 | A*23:01 | A*33:03 | B*07:02 | B*44:03 | C*07:01 | C*07:02 | DRB1*07:01 | DRB1*09:01 | DQB1*02:01 | DQB1*02:01 |
| Donor 8 | A*03:01 | A*24:02 | B*07:02 | B*40:01 | C*03:04 | C*07:02 | DRB1*07:01 | DRB1*15:01 | DQB1*03:03 | DQB1*06:02 |
| Donor 9 | A*03:01 | A*26:01 | B*07:02 | B*40:01 | C*03:04 | C*07:02 | DRB1*11:03 | DRB1*15:01 | DQB1*03:01 | DQB1*06:02 |
| Donor 10 | A*30:02 | A*66:01 | B*18:01 | B*58:02 | C*05:01 | C*06:02 | DRB1*13:01 | DRB1*15:01 | DQB1*03:03 | DQB1*06:02 |
| Donor 11 | A*02:01 | A*24:02 | B*44:02 | B*44:05 | C*02:02 | C*05:01 | DRB1*04:01 | DRB1*11:01 | DQB1*03:01 | DQB1*03:01 |
| Donor 12 | A*02:01 | A*02:01 | B*44:02 | B*44:02 | C*05:01 | C*05:01 | DRB1*04:01 | DRB1*04:04 | DQB1*03:01 | DQB1*03:02 |

| PDX# 160615-1 | A*02:01 | A*02:01 | B*40:01 | B*44:02 | C*03:04 | C*07:04 | DRB1*11:01 | DRB1*13:01 | DQB1*03:01 | DQB1*06:03 |
| --- | --- | --- | --- | --- | --- | --- | --- | --- | --- | --- |
| Donor 13 | A*02:01 | A*02:01 | B*07:02 | B*27:05 | C*02:02 | C*07:02 | DRB1*11:01 | DRB1*15:01 | DQB1*03:01 | DQB1*06:02 |
| Donor 14 | A*02:01 | A*02:01 | B*35:01 | B*57:01 | C*04:01 | C*07:01 | DRB1*11:01 | DRB1*15:01 | DQB1*02:01 | DQB1*03:03 |

**Supplemental Table 2. Human PBMC Donor HLA.** Table contains the HLA type of the GBM PDXs 160721-1 and 160615-1 and the PBMC donors. Green indicates major locus match to the respective PDX.
